## Severe aortic stenosis in octogenarian: is surgical aortic valve replacement a good option?

Menezes Fernandes R.; Costa HA.; Bispo JS.; Mota TF.; Bento D.; Marques N.; Jesus I.

Algarve University Hospital Center, Cardiology, Faro, Portugal

**Funding Acknowledgements:** Type of funding sources: None.

**Introduction:** Aortic stenosis (AS) is the most prevalent valvular heart disease among the elderly, reaching 8,1% in 85 years-old patients. Symptomatic severe AS entails a high risk of morbidity and mortality without valve replacement, and increasing age is associated with higher surgical risk.

**Purpose:** To determine the prognostic impact of advanced age in patients with severe AS referred to surgical valve replacement.

**Methods:** We conducted a retrospective study encompassing patients referred to surgical aortic valve replacement due to severe AS, from January 2016 to December 2018. Clinical characteristics, diagnostic studies and follow-up were analysed. Patients were divided in two groups according to the age: <80 and ≥80 years old. Independent predictors of mortality and/or re-hospitalization were identified through a binary logistic regression analysis, considering  $p = 0,05$ .

**Results:** A total of 222 patients were included, with a 64,4% male predominance and a median age of 75 years old. 27,5% had concomitant surgical coronary artery disease and 87,4% waited in an out-patient setting. Median delay until surgery was 87 days and median follow-up after surgical referral was 517 days. 59 patients (26,8%) had ≥ 80 years old. Male gender (69,6% vs 50,8%;  $p = 0,01$ ), smoking habits (14,3% vs 1,7%;  $p = 0,024$ ), higher glomerular filtration rate (75,5 vs 63,2 ml/min;  $p = 0,001$ ) and lower Euroscore II values (2,89% vs 4,64%;  $p = 0,003$ ) were more common in younger patients. Global mortality rate (27,1% vs 15,5%;  $p = 0,05$ ) and the composite of mortality or re-hospitalization (52,5% vs 36,6%;  $p = 0,034$ ) were more frequent in older patients. Despite re-hospitalizations were also more common (37,3% vs 29,2%), they did not reach statistical significance ( $p = 0,252$ ). After multivariate analysis, advanced age was not an independent predictor of mortality and/or re-hospitalization. In this population, only the presence of extracardiac arteriopathy ( $p = 0,007$ ;  $p = 0,006$ ) and pulmonary hypertension ( $p = 0,004$ ;  $p = 0,002$ ) were both independent predictors of mortality and the composite of mortality or re-hospitalization.

**Conclusion:** Older patients with AS have higher mortality, but advanced age was not an independent predictor of mortality and/or re-hospitalization. The decision to perform aortic valve replacement should be discussed in the Heart Team, considering patient's comorbidities and performing a comprehensive geriatric evaluation, not just focusing on age itself.
